# Supplementary material
Source: PubMed Central journal article supplement (PMC2596225)
Supplement: 0806306105_0806306105SI.pdf [file 0806306105_0806306105SI.pdf]

# Supporting Information

Jordan *et al.* 10.1073/pnas.0806306105

## SI Text

**Functional Analysis.** For single-channel recording, pipettes were pulled from borosilicate glass (Sutter Instrument) and were filled with chloride-containing pipette solution (in mM): 150 NMDG-Cl, 5 MgCl<sub>2</sub>, 10 TES (pH 7.5). Channels were activated by excision into intracellular solution containing (in mM): 150 NMDG-Cl, 1.1 MgCl<sub>2</sub>, 2 Tris-EGTA, 10 TES, 1 MgATP, and 50 Units/ml PKA (pH 7.5). CFTR currents were measured with an

Axopatch 200B amplifier (Axon Instruments) and were recorded at 10 kHz to DAT tape. For subsequent analysis, records were played back and filtered with a four-pole Bessel filter (Warner Instruments) at a corner frequency of 100 Hz and acquired by using a Digidata 1322A interface (Axon) and computer at 500 Hz with pClamp 8.2. For display, single channel records were filtered digitally to 70 Hz.

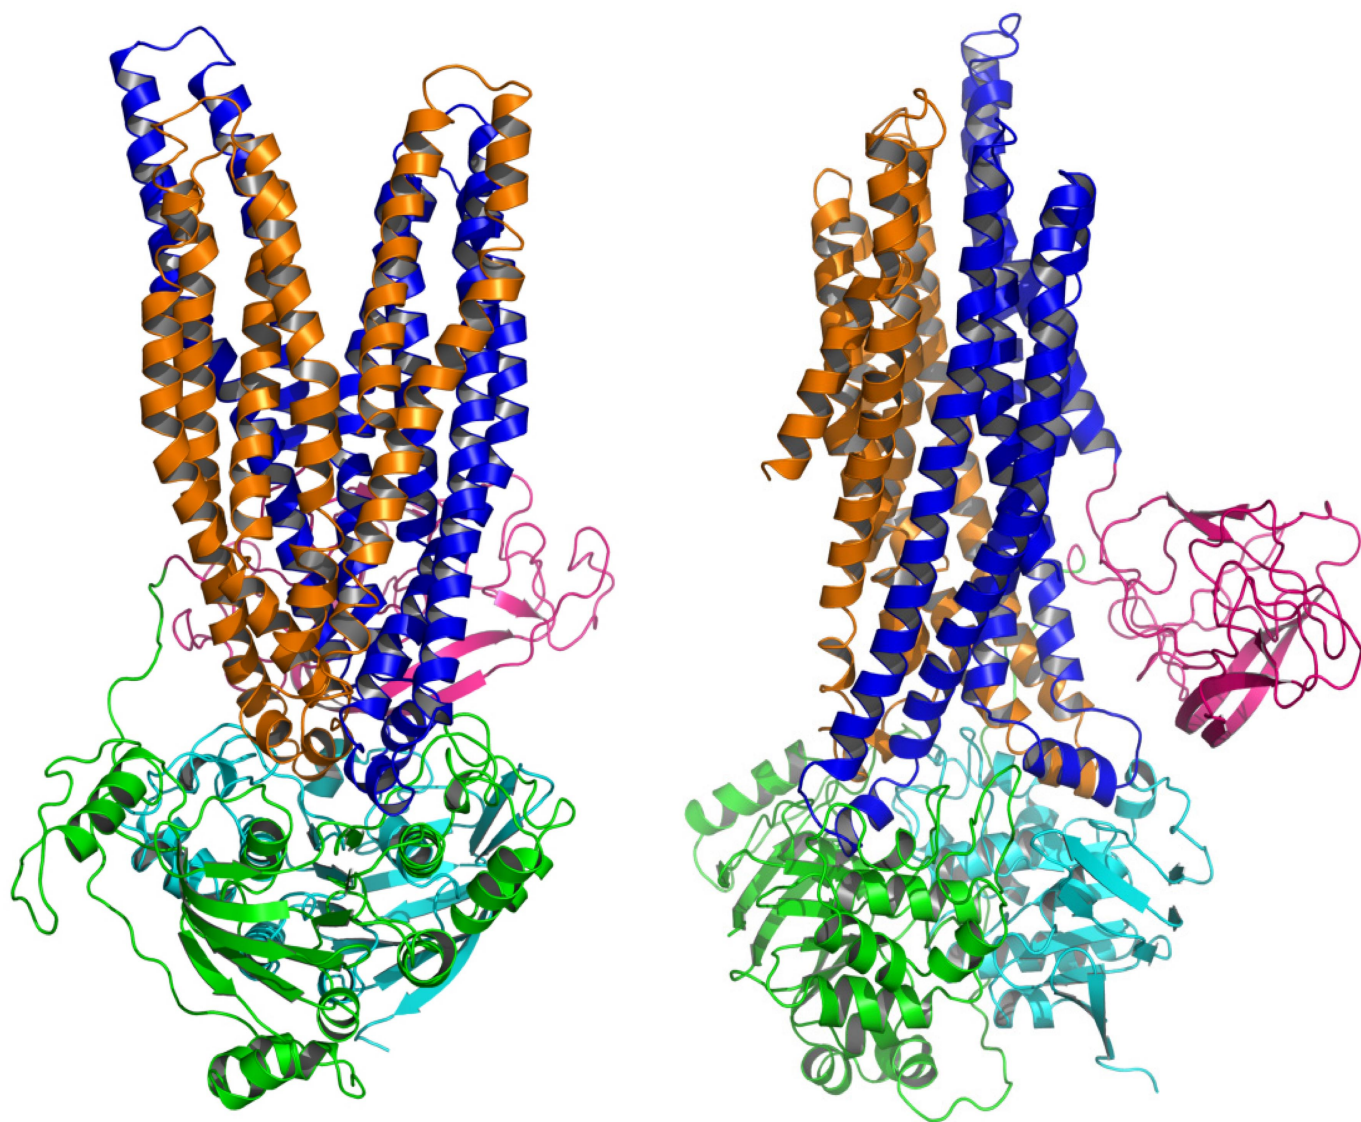

**Fig. S1.** Three-dimensional domain architecture of CFTR shown from the front (*Left*) and rotated 90° (*Right*). TMD1 is shown in orange, TMD2 is blue. The cytosolic domains are colored as: ABC1, green; ABC2, cyan; R-domain, pink.



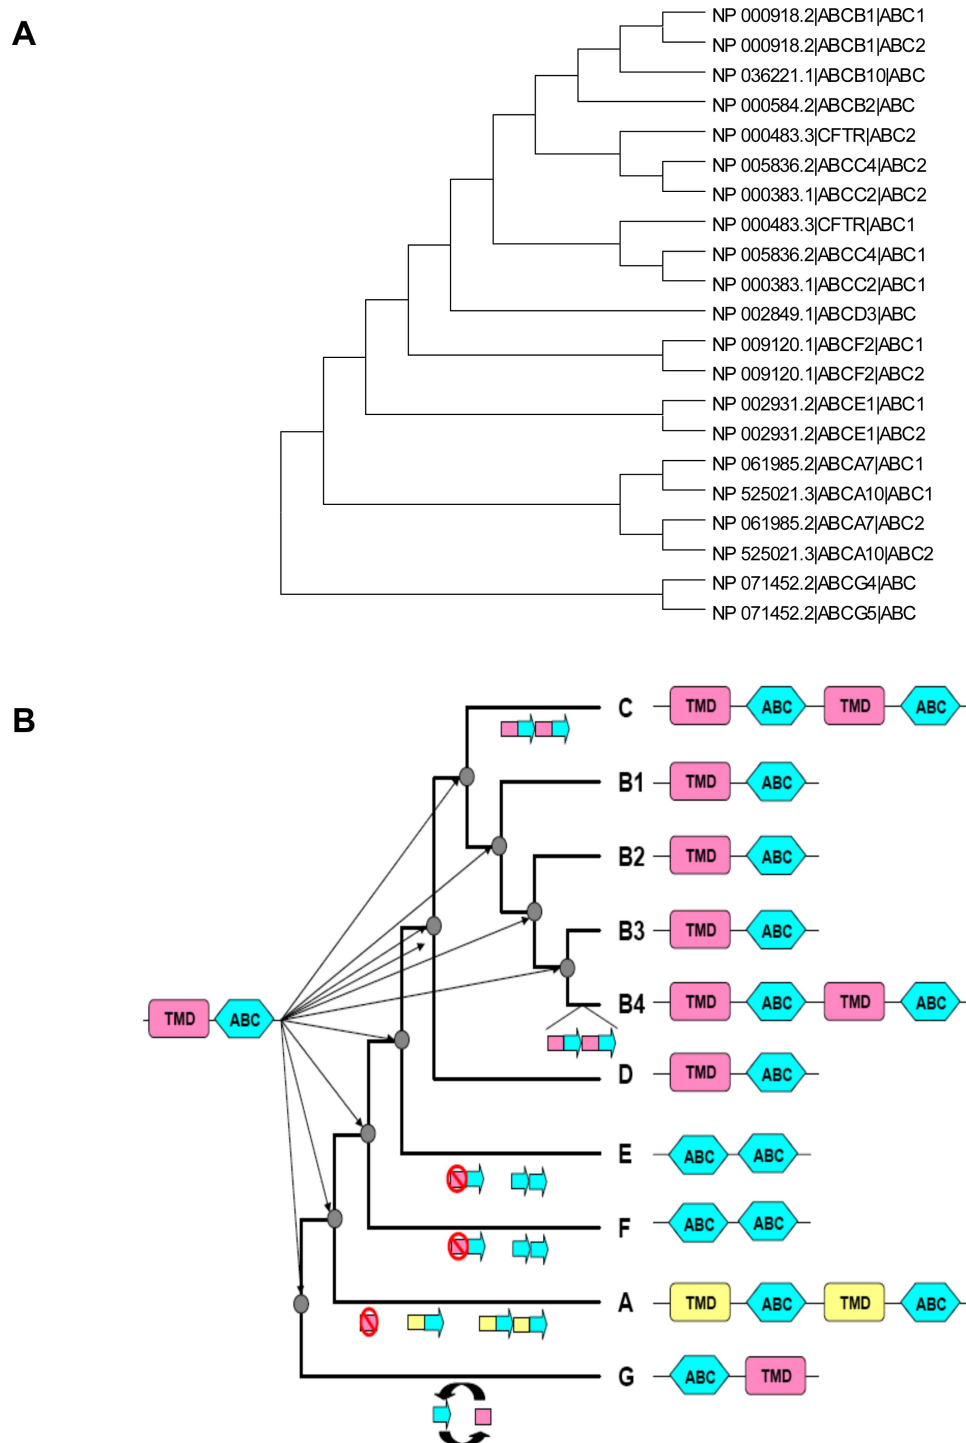

**Fig. S3.** Evolution of ABC family domain architecture. (A) ABC domain phylogenetic analysis, which was used to reconstruct the history of CFTR domain architecture evolution (B). In A, individual ABC domains (ABC1 and ABC2) were aligned and their evolutionary histories were reconstructed. An internal duplication leading to a domain architecture with two ABC domains would yield a phylogeny where both ABC (1 and 2) domains from a single protein are sister taxa (e.g., ABCB1). Ancient duplication followed by divergence would yield a phylogeny where the same ABC domains from different proteins are sister taxa (e.g., ABCA7 and ABCA10). In B, the scheme shown is based on the phylogenies shown in Fig. S2 and Fig. S3A. Domain architectures, that is, linear organizations of TMDs and ABC domains, are shown for human ABC A-G family proteins. Members of ABC subfamily B show two different domain architectures. The comparative method was used to infer the ancestral ABC family domain architecture and to reconstruct the specific domain architecture changes along evolutionary lineages leading to the extant subfamilies, or in the case of subfamily B the individual members. The ancestral state and domain architecture changes are inferred as those that entail the fewest number of changes along the tree, that is, the most parsimonious scenario. Specific domain architecture changes are shown below the branches where they are inferred to have occurred.

**Fig. S4.** Rationale behind the type II divergence analysis. (A) An ancient gene duplication yields two paralogous groups of related proteins, such as CFTR and ABCC4. Changes in functional constraints between paralogous groups occur in two phases: an early phase (pink) just after duplication (D) and a later phase (yellow) during speciation (S) within each group. Early phase changes are characterized by relaxation of functional constraint along one or both duplicate lineages. Sites that are responsible for group-specific functions diverge rapidly during this phase. Once paralog-specific functions that distinguish groups are encoded, late phase changes occur during speciation within groups. Sites that have group-specific critical functions do not change within groups during the late phase. Sites that have group-specific critical functions and are responsible for functional differences between groups, the so-called type II sites, also do not change. This is why type II divergence sites are maximally divergent between groups and absolutely conserved within groups. Sites that are functionally critical to both groups remain absolutely conserved after duplication and speciation, and such sites do not reveal anything about functional differences between groups. (B) Phylogeny of 20 CFTR and 18 ABCC4 proteins used in the functional divergence analysis.

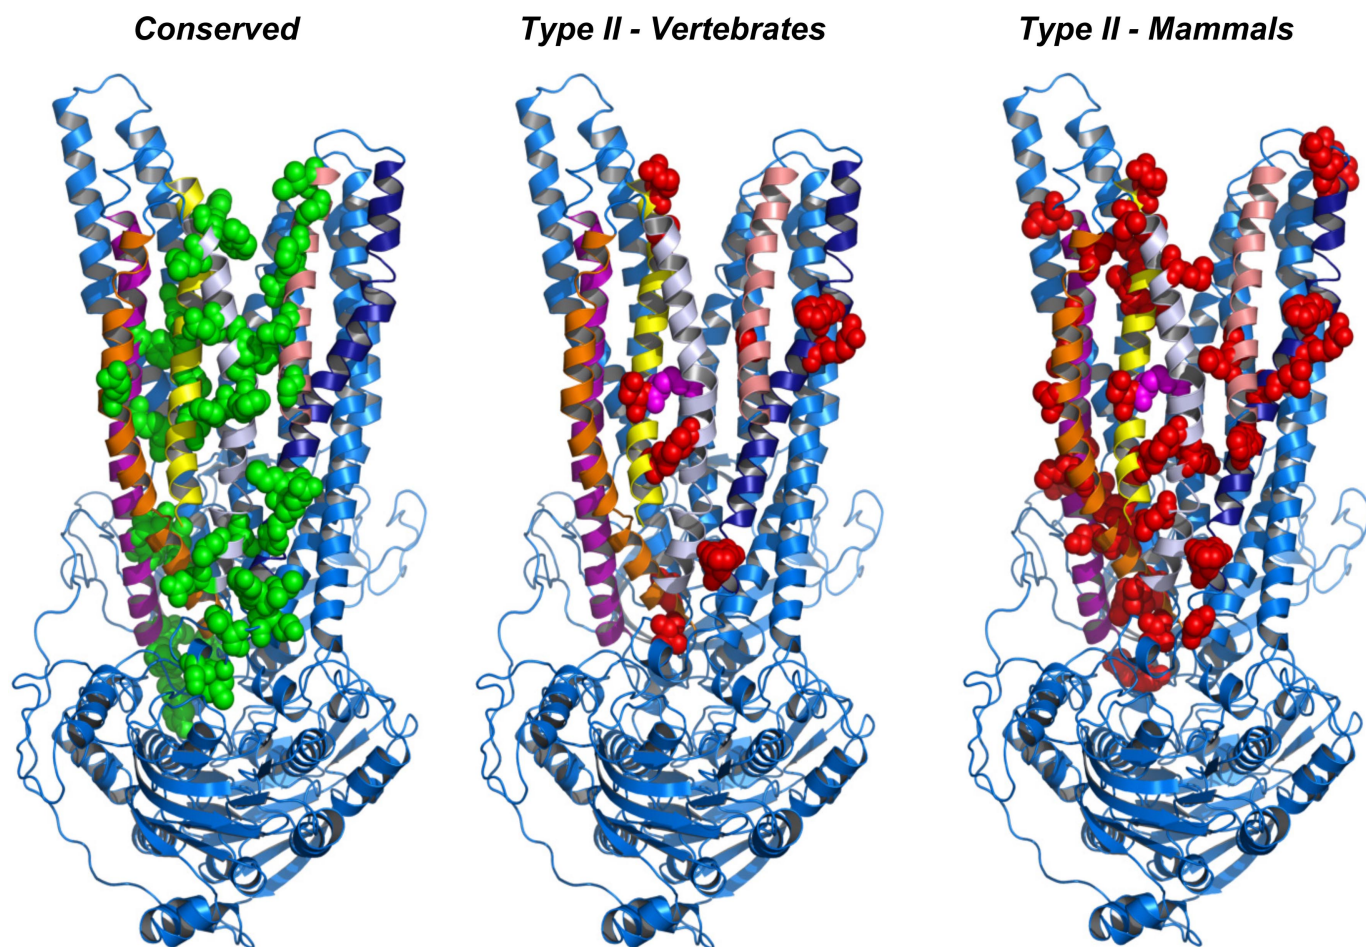

**Fig. S5.** Structural environment of conserved (*Left*) and type II divergent (*Center and Right*) CFTR residues in TMD1 shown within the context of the entire CFTR protein. Helices are colored as follows: TM1, salmon; TM2, dark blue; TM3, silver; TM4, orange; TM5, purple; and TM6, yellow. TMD2, both ABC domains, and the R-domain are shown in blue. This clearly demonstrates the location of both conserved and type II divergent sites located within the interconnecting domains that are involved in transmitting structural rearrangements from the ABC domains to the TMDs.

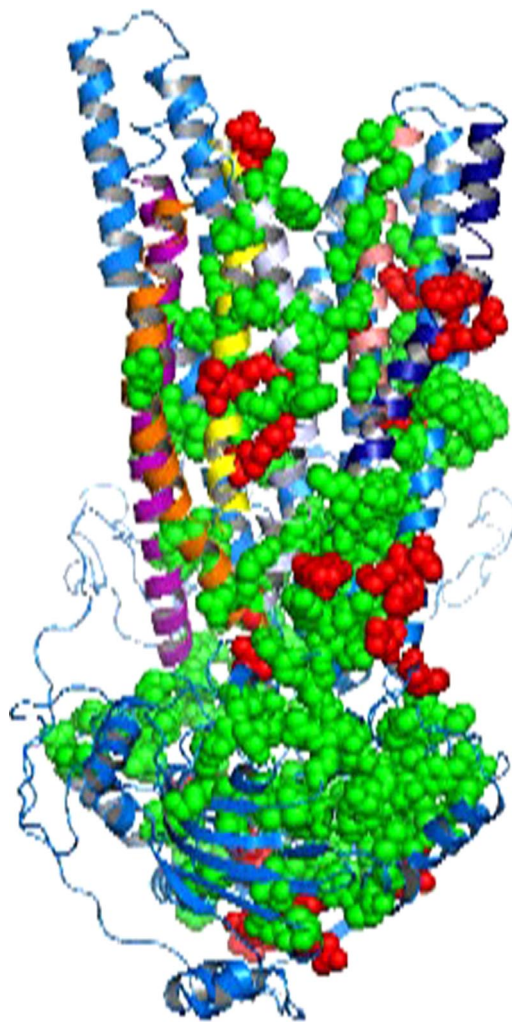

**Movie S1.** Conserved and divergent sites in all four domains: Vertebrate proteins. Conserved and type II divergent residues are shown as green and red spheres, respectively, for the entire CFTR protein. CFTR is rotated about the y-axis to illustrate how widely dispersed both conserved and type II divergent sites are within the protein. The helices of TMD1 are colored as follows: TM1, salmon; TM2, dark blue; TM3, silver; TM4, orange; TM5, purple; and TM6, yellow. The remainder of CFTR is colored blue.

[Movie S1 \(MPG\)](#)

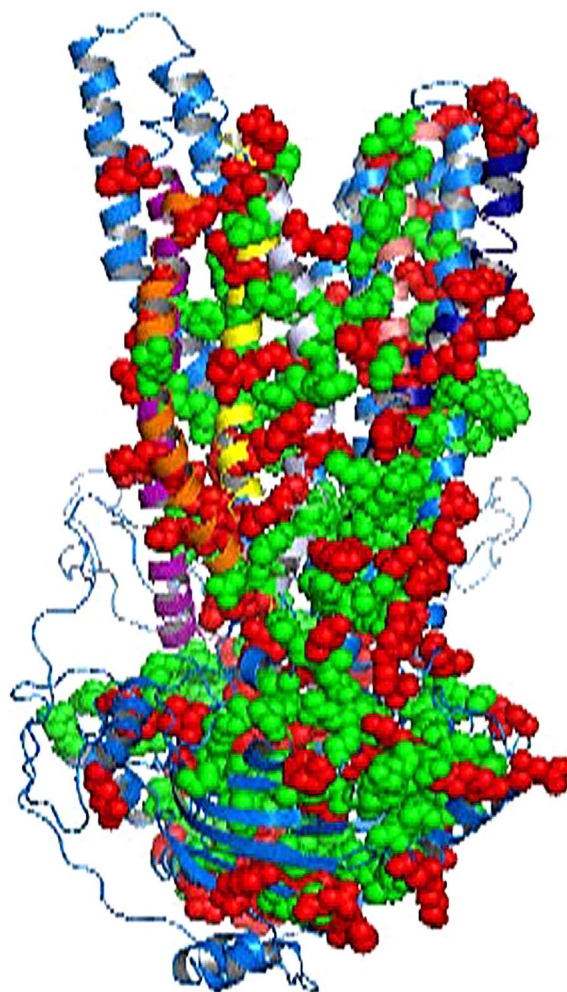

**Movie S2.** Conserved and divergent sites in all four domains: Mammalian proteins. Conserved and type II divergent residues are shown as green and red spheres, respectively, for the entire CFTR protein. CFTR is rotated about the y-axis to illustrate how widely dispersed both conserved and type II divergent sites are within the protein. The helices of TMD1 are colored as follows: TM1, salmon; TM2, dark blue; TM3, silver; TM4, orange; TM5, purple; and TM6, yellow. The remainder of CFTR is colored blue.

[Movie S2 \(MPG\)](#)

**Role in CFTR or association with CF disease and categories  
of effects of mutations\* and Refs.**

| Amino acid residue | TM helix             | of effects of mutations* and Refs. |
|--------------------|----------------------|------------------------------------|
| M82                | 1                    | A 1                                |
| Y84                | 1                    | A 1                                |
| G85                | 1                    | A 1                                |
| F87                | 1                    | A 1                                |
| L88                | 1                    | A 1                                |
| Y89                | 1                    | A 1                                |
| L90                | 1                    | A 1                                |
| G91                | 1                    | A 1, C 2                           |
| E92                | 1                    | A 1                                |
| K95                | 1                    | C 3, B 4                           |
| A96                | 1                    | A 1                                |
| Q98                | 1                    | A 1                                |
| P99                | 1                    | A 1, C 5                           |
| L101               | 1                    | A 1                                |
| I105               | 1                    | A 1                                |
| A107               | 1                    | A 1                                |
| S108               | 1                    | A 1                                |
| Y109               | Extracellular Loop 1 | A 1                                |
| D110               | Extracellular Loop 1 | A 1                                |
| P111               | Extracellular Loop 1 | A 1                                |
| N113               | Extracellular Loop 1 | A 1                                |
| E116               | 2                    | A 1                                |
| R117               | 2                    | A 1, C 6, S 6                      |
| I119               | 2                    | A 1                                |
| A120               | 2                    | A 1                                |
| Y122               | 2                    | A 1                                |
| I125               | 2                    | A 1                                |
| G126               | 2                    | A 1                                |
| L137               | 2                    | A 1                                |
| H139               | 2                    | A 1, P 7                           |
| P140               | 2                    | A 1                                |
| A141               | 2                    | A 1                                |
| L145               | 2                    | A 1                                |
| H146               | 2                    | A 1                                |
| I148               | 2                    | A 1                                |
| G149               | 2                    | A 1, P 7                           |
| Q151               | 2                    | A 1                                |
| M152               | 2                    | A 1                                |
| A155               | 2                    | A 1                                |
| S158               | 2                    | A 1                                |
| L159               | 2                    | A 1                                |
| Y161               | Intracellular Loop 1 | A 1                                |
| K162               | Intracellular Loop 1 | A 1                                |
| L165               | Intracellular Loop 1 | A 1                                |
| R170               | Intracellular Loop 1 | A 1                                |
| I175               | Intracellular Loop 1 | A 1                                |
| I177               | Intracellular Loop 1 | A 1                                |
| G178               | Intracellular Loop 1 | A 1                                |
| Q179               | 3                    | A 1                                |
| L183               | 3                    | A 1                                |
| N186               | 3                    | A 1                                |
| N187               | 3                    | A 1                                |
| N189               | 3                    | A 1                                |
| D192               | 3                    | A 1, P 7                           |
| E193               | 3                    | A 1, S 7                           |
| G194               | 3                    | A 1                                |
| A196               | 3                    | A 1                                |
| H199               | 3                    | A 1                                |
| F200               | 3                    | A 1                                |
| V201               | 3                    | A 1                                |
| W202               | 3                    | A 1                                |
| I203               | 3                    | A 1                                |
| P205               | 3                    | A 1, C 5                           |

| Amino acid residue | TM helix             | Role in CFTR or association with CF disease and categories of effects of mutations* and Refs. |
|--------------------|----------------------|-----------------------------------------------------------------------------------------------|
| L206               | 3                    | A 1                                                                                           |
| A209               | 3                    | A 1                                                                                           |
| L210               | 3                    | A 1                                                                                           |
| G213               | 3                    | A 1                                                                                           |
| E217               | 3                    | A 1                                                                                           |
| Q220               | Extracellular Loop 2 | A 1                                                                                           |
| C225               | 4                    | A 1                                                                                           |
| L227               | 4                    | A 1                                                                                           |
| V232               | 4                    | A 1                                                                                           |
| Q237               | 4                    | A 1                                                                                           |
| A238               | 4                    | A 1                                                                                           |
| G239               | 4                    | A 1                                                                                           |
| G241               | 4                    | A 1                                                                                           |
| M243               | 4                    | A 1                                                                                           |
| M244               | 4                    | A 1                                                                                           |
| R248               | 4                    | A1                                                                                            |
| R258               | 4                    | A 1, P 7                                                                                      |
| M265               | 4                    | A 1                                                                                           |
| W277               | Intracellular Loop 2 | A 1                                                                                           |
| E279               | 5                    | A 1                                                                                           |
| M281               | 5                    | A 1                                                                                           |
| I285               | 5                    | A 1                                                                                           |
| N287               | 5                    | A 1                                                                                           |
| E292               | 5                    | A 1                                                                                           |
| L293               | 5                    | A 1                                                                                           |
| R297               | 5                    | A 1                                                                                           |
| A299               | 5                    | A 1                                                                                           |
| Y301               | 5                    | A 1                                                                                           |
| R303               | 5                    | C 8                                                                                           |
| F305               | 5                    | A 1                                                                                           |
| S307               | 5                    | A 1                                                                                           |
| A309               | 5                    | A 1                                                                                           |
| F311               | 5                    | A 1                                                                                           |
| S313               | 5                    | A 1                                                                                           |
| G314               | 5                    | A 1, C 2                                                                                      |
| F316               | 5                    | A 1                                                                                           |
| V317               | 5                    | G 9                                                                                           |
| L320               | 5                    | A 1                                                                                           |
| S321               | 5                    | A 1                                                                                           |
| V322               | 5                    | A 1                                                                                           |
| P324               | Extracellular Loop 3 | C 5                                                                                           |
| L327               | Extracellular Loop 3 | A 1                                                                                           |
| I331               | Extracellular Loop 3 | S 10                                                                                          |
| L333               | 6                    | S 10                                                                                          |
| R334               | 6                    | A 1, C 6,11,12,13, B 13,14, S 13,15                                                           |
| K335               | 6                    | C 2,3,11,16,18,19, B 14,17, S 10                                                              |
| I336               | 6                    | A 1                                                                                           |
| F337               | 6                    | C 11,20,22, B 14,21                                                                           |
| T338               | 6                    | A 1, C 11,19,20,22,23,24, B 17,21, S 25                                                       |
| T339               | 6                    | C 23,24                                                                                       |
| I340               | 6                    | A 1                                                                                           |
| S341               | 6                    | A 1, C 11,19, B 14,17                                                                         |
| I344               | 6                    | C 22, B 14                                                                                    |
| L346               | 6                    | A 1                                                                                           |
| R347               | 6                    | A 1, C 6,16,18,27,28,30,31, B 14,16,26,32, S 27, N 29                                         |
| M348               | 6                    | A 1, B 14                                                                                     |
| A349               | 6                    | A 1                                                                                           |
| V350               | 6                    | B 14                                                                                          |
| R352               | 6                    | A 1, C 8,11,30,33,34, B 14,34, S 34, N 34, G 34                                               |
| Q353               | 6                    | A 1                                                                                           |
| P355               | 6                    | A 1                                                                                           |
| W356               | 6                    | A 1                                                                                           |
| Q359               | 6                    | A 1                                                                                           |
| T360               | 6                    | A 1                                                                                           |

| Amino acid residue | TM helix | Role in CFTR or association with CF disease and categories of effects of mutations* and Refs. |
|--------------------|----------|-----------------------------------------------------------------------------------------------|
| W361               | 6        | A 1                                                                                           |

\*Categories include: A, Disease-associated; B, Affects block of the pore by drugs or large anions; C, Affects conductance, selectivity, or current rectification; G, Affects macroscopic gating; N, Has nonspecific effects such as inducing appearance of sensitivity to sulfhydryl-modifying reagents; P, Affects processing of new CFTR polypeptide; S, Affects stability of the open channel state or open probability.

1. Tsui LC, Zielenski J, O'Brien A (2008) Cystic Fibrosis Mutation Database, <http://www.genet.sickkids.on.ca/cftr/Home.html>.
2. Mansoura MK, et al. (1998) *Biophys J* 74:1320–1332.
3. Anderson MP, et al. (1991) *Science* 253:202–205.
4. Linsdell P. (2005) *J Biol Chem* 280:8945–8950.
5. Sheppard DN, Travis SM, Ishihara H, Welsh MJ (1996) *J Biol Chem* 271:14995–15001.
6. Sheppard DN, et al. (1993) *Nature* 362:160–164.
7. Seibert FS, et al. (1997) *Biochemistry* 36:11966–11974.
8. St.Aubin CN, Linsdell P (2006) *J Gen Physiol* 128:535–545.
9. Zhang ZR, Zeltwanger S, Smith SS, Dawson DC, McCarty NA (2001) *Am J Physiol* 282:L135–L145.
10. Beck EJ, Yang Y, Yaemsiri S, Raghuram V (2008) *J Biol Chem* 283:4957–4966.
11. Fatehi M, Linsdell P (2008) *J Biol Chem* 283:6102–6109.
12. Gong X, Linsdell P (2003) *J Physiol* 549:387–397.
13. Smith SS, et al. (2001) *J Gen Physiol* 118:407–431.
14. Cui G, Zhang ZR, Song B, McCarty NA (unpublished observations)
15. Zhang ZR, Song B, McCarty NA (2005) *J Biol Chem* 280:41997–42003.
16. Linsdell P, Hanrahan JW (1998) *J Gen Physiol* 111:601–614.
17. McDonough S, Davidson N, Lester HA, McCarty NA (1994) *Neuron* 13:623–634.
18. Tabcharani JA, et al. (1993) *Nature* 366:79–82.
19. McCarty NA, Zhang ZR (2001) *Am J Physiol* 281:L852–L867.
20. Linsdell P (2001) *J Physiol* 531:51–66.
21. Gupta J, Linsdell P (2002) *Pflügers Arch* 443:739–747.
22. Linsdell P, Evagelidis A, Hanrahan JW (2000) *Biophys J* 78:2973–2982.
23. Linsdell P, et al. (1997) *J Gen Physiol* 110:355–364.
24. Linsdell P, Zheng SX, Hanrahan JW (1998) *J Physiol* 512:1–16.
25. Liu X, et al. (2004) *Biophys J* 87:3826–3841.
26. Wang W, Li G, Clancy JP, Kirk KL (2005) *J Biol Chem* 280:23622–23630.
27. Cotten JF, Welsh MJ (1999) *J Biol Chem* 274:5429–5435.
28. Kogan I, et al. (2003) *EMBO J* 22:1981–1989.
29. Kogan I, Ramjeesingh M, Huan LJ, Wang Y, Bear CE (2001) *J Biol Chem* 276:11575–11581.
30. Cheung M, Akabas MH (1997) *J Gen Physiol* 109:289–299.
31. Tabcharani JA, Linsdell P, Hanrahan JW (1997) *J Gen Physiol* 110:341–351.
32. Linsdell P, Hanrahan JW (1996) *J Physiol (Camb)* 496:687–693.
33. Guinamard R, Akabas MH (1999) *Biochemistry* 38:5528–5537.
34. Cui G, Zhang ZR, O'Brien ARW, Song B, McCarty NA (2008) *J Membr Biol* 222:91–106.

**Table S2. Type-II divergence sites for TMD1 across all vertebrates**

| Position | CFTR | ABCC4 | Property Change             |
|----------|------|-------|-----------------------------|
| 91       | G    | E     | Hydrophilic vs. Acidic      |
| 131      | F    | T     | Hydrophobic vs. Hydrophilic |
| 134      | R    | L     | Basic vs. Hydrophobic       |
| 157      | F    | C     | Hydrophobic vs. Hydrophilic |
| 158      | S    | H     | Polar uncharged vs. Basic   |
| 175      | I    | T     | Hydrophobic vs. Hydrophilic |
| 195      | L    | T     | Hydrophobic vs. Hydrophilic |
| 262      | T    | M     | Hydrophilic vs. Hydrophobic |
| 334      | R    | S     | Basic vs. Hydrophilic       |
| 352      | R    | L     | Basic vs. Hydrophobic       |
| 353      | Q    | F     | Hydrophilic vs. Hydrophobic |
| 359      | Q    | E     | Hydrophilic vs. Acidic      |

**Table S3. Divergence site bins for TMD1**

| Bin          | Between groups                | Within groups  | Number of sites | Average Posterior Probability |
|--------------|-------------------------------|----------------|-----------------|-------------------------------|
| Conserved    | No change or conserved change | 0–3 changes    | 108             | 0.11                          |
| Intermediate | Conserved change              | 0–3 changes    | 100             | 2.53                          |
| Class 1      |                               |                |                 |                               |
| Intermediate | Conserved or Radical change   | 4–9 AA changes | 44              | 7.16                          |
| Class 2      |                               |                |                 |                               |
| Intermediate | Radical change                | 1–3 AA changes | 17              | 12.54                         |
| Class 3      |                               |                |                 |                               |
| Type-II      | Radical change                | No change      | 12              | 29.74                         |

**Table S4. Accession numbers and names for human ABC sequences analyzed in this study**

| Refseq ID      | Protein name |
|----------------|--------------|
| NP_000483.3    | CFTR         |
| NP_005493.2    | ABCA1        |
| NP_001597.2    | ABCA2        |
| NP_001080.2    | ABCA3        |
| NP_000341.2    | ABCA4        |
| NP_061142.2    | ABCA5        |
| NP_525023.2    | ABCA6        |
| NP_061985.2    | ABCA7        |
| NP_009099.1    | ABCA8        |
| NP_525022.2    | ABCA9        |
| NP_525021.3    | ABCA10       |
| NP_775099.2    | ABCA12       |
| NP_689914.2    | ABCA13       |
| NP_000918.2    | ABCB1        |
| NP_000584.2    | TAP1         |
| NP_000535.3    | TAP2         |
| NP_000434.1    | ABCB4        |
| NP_848654.3    | ABCB5        |
| NP_005680.1    | ABCB6        |
| NP_004290.2    | ABCB7        |
| NP_009119.2    | ABCB8        |
| NP_062571.1    | ABCB9        |
| NP_036221.1    | ABCB10       |
| NP_003733.2    | ABCB11       |
| NP_004987.2    | ABCC1        |
| NP_000383.1    | ABCC2        |
| NP_003777.2    | ABCC3        |
| NP_005836.2    | ABCC4        |
| NP_005679.2    | ABCC5        |
| NP_001162.3    | ABCC6        |
| NP_000343.2    | ABCC8        |
| NP_064694.2    | ABCC9        |
| NP_258261.2    | ABCC10       |
| NP_149163.2    | ABCC11       |
| NP_150229.2    | ABCC12       |
| NP_000024.2    | ABCD1        |
| NP_005155.1    | ABCD2        |
| NP_002849.1    | ABCD3        |
| NP_005041.1    | ABCD4        |
| NP_002931.2    | ABCE1        |
| NP_001020262.1 | ABCF1        |
| NP_009120.1    | ABCF2        |
| NP_060828.2    | ABCF3        |
| NP_997510.1    | ABCG1        |
| NP_004818.2    | ABCG2        |
| NP_071452.2    | ABCG4        |
| NP_071881.1    | ABCG5        |
| NP_071882.1    | ABCG8        |
